# Supplementary material for: Quantitative assessment of finger motor performance: Normative data
Source: PLoS One. 2017 Oct 18;12(10):e0186524. doi: 10.1371/journal.pone.0186524 (PMC5646860; doi:10.1371/journal.pone.0186524)
Supplement: S1 File — (XLSX) [file pone.0186524.s003.xlsx]

## Sheet: Foglio1
NORMATIVE VALUES FOR HAND MOTOR PERFORMANCES
1. CHARACTERISTICS
AGE	SEX
	Male = 1 Female = 0
25	0
NORMATIVE STATISTICS
PARAMETER	PROTOCOL	NORMATIVE VALUES
		Predicted value	Prediction interval (95%)
Rate	SV	2.295	1.3542	3.2358
Rate	MV	3.16636	2.05308	4.27964
TD	2Hz	216.09	121.03	311.15
ITI	2Hz	281.97	174.64	389.3
TD/ITI	2Hz	0.8862	-0.08988	1.86228
%ADV_MOV	2Hz	86.9778	31.9778	100
%CORR_SEQ	2Hz	83.3064	24.5064	100
IHI	2Hz_Bim	21.6307	6.99472	66.8917
